# Supplementary material for: Combined Column Test for Characterization of Leaching and Transport of Trace Elements in Contaminated Soils
Source: MDPI journal article supplement (doi:10.3390/w15050874), 2023-02-24
Supplement: s1 [file s1]

## Supporting Information

### **Combined column test for characterization of leaching and transport of trace elements in contaminated soils**

Karen Ane Skjennum<sup>1,2</sup>, Helen K. French<sup>2,3</sup>, Pasquale Carotenuto<sup>4</sup> and Gudny Okkenhaug<sup>2,4</sup>

<sup>1</sup> *Lindum AS, 3036 Drammen, Norway*

<sup>2</sup> *Faculty of Environmental Sciences and Natural Resource Management, Norwegian University of Life Sciences (NMBU), 1430 Ås, Norway*

<sup>3</sup> *Norwegian Institute of Bioeconomy Research (NIBIO), 1430 Ås, Norway*

<sup>4</sup> *Norwegian Geotechnical Institute (NGI), 0484 Oslo, Norway*

This supporting information consists of two sections: S.1) Supplementary method description and S.2) Supplementary data.

#### Summary of the numbers in Supporting Information

- Number of pages: 7
- Number of tables: 10
- Number of figures: 1

## S.1. Supplementary method description

### S.1.1. Bulk density

Bulk density ( $\rho_b$ ) in the combined columns was calculated as

$$\rho_b = \frac{\text{dry mass sample}}{\text{sample volume}} \quad (\text{S1})$$

### S.1.2. Calculations pore number and porosity

The pore number and porosity in the combined columns were theoretically calculated based on the following argumentation:

The pore number ( $e$ ) is the ratio between the pore volume ( $V_p$ ) and the volume of solid material ( $V_s$ ), equivalent to the gas filled pore volume ( $V_a$ ) and the water-occupied pore volume ( $V_w$ ):

$$e = \frac{V_p}{V_s} = \frac{V_a + V_w}{V_s} \quad (\text{S2})$$

The pore volume can also be derived from the specific gravity ( $G_s$ ), the volumetric water content ( $w$ ) and the degree of saturation ( $S_r$ )

$$e = \frac{wG_s}{S_r} \quad (\text{S3})$$

Under 100 % saturation ( $S_r = 1$ ), where  $V_w$  is assumed to equal  $V_p$ , the pore number can be expressed as

$$e = wG_s \quad (\text{S4})$$

Hence, the pore numbers were calculated as following:

$$e = \left( \frac{G_s \gamma_w}{\gamma_d} \right) - 1 \quad (\text{S5})$$

where  $\gamma_w$  is the unit weight of water ( $\text{kg/m}^3$ ),  $\gamma_d$  is the dry unit weight ( $\text{kg/m}^3$ ) and  $G_s$  the specific gravity.

The porosity ( $n$ ) was calculated as:

$$n = \frac{e}{1+e} \quad (\text{S6})$$

### S.1.3. Calculations porewater velocity

The porewater velocity ( $v$ ) is the ratio between Darcy flux ( $q$ ) and porosity ( $n$ ):

$$v = \frac{q}{n} \quad (\text{S7})$$

The Darcy flux was calculated as:

$$q = \frac{\text{pumping rate}}{A} \quad (\text{S8})$$

where pumping rate is the pumping rate of the peristaltic pump (mL/d), and A is the cross-sectional area of the combined columns (A).

## S.2. Supplementary data

**Table S1** Limits of Quantification (LOQ) for TIC and TOC analysis.

|                           | <b>TIC</b> | <b>TOC</b>        |
|---------------------------|------------|-------------------|
| <b>LOQ (% dry matter)</b> | 0.010      | 0.01 <sup>a</sup> |

<sup>a</sup>Limit of reporting (LOR)

**Table S2** Particle size distribution (< 4 mm).

|                                        | <b>&lt; 0.002<br/>(mm)</b> | <b>&lt; 0.006<br/>(mm)</b> | <b>&lt; 0.02<br/>(mm)</b> | <b>&lt; 0.06<br/>(mm)</b> | <b>&lt; 0.2<br/>(mm)</b> | <b>&lt; 0.6<br/>(mm)</b> | <b>&lt; 2<br/>(mm)</b> | <b>&lt; 4<br/>(mm)</b> |
|----------------------------------------|----------------------------|----------------------------|---------------------------|---------------------------|--------------------------|--------------------------|------------------------|------------------------|
| <b>Shooting<br/>range<br/>soil (%)</b> | 7                          | 12                         | 23                        | 41                        | 64                       | 83                       | 95                     | 100                    |
| <b>Urban<br/>soil (%)</b>              | 10                         | 17                         | 28                        | 39                        | 53                       | 71                       | 89                     | 100                    |

**Table S3** Limits of Quantification (LOQ) for ICP-MS analysis of solid soil samples (total concentrations).

|             | Fe  | Cu   | Zn   | Sb    | Pb   |
|-------------|-----|------|------|-------|------|
| LOQ (mg/kg) | 1.5 | 0.42 | 5.30 | 0.002 | 0.26 |

**Table S4** Packing specifications and key numbers from the combined columns.

| Soil                | Density | Column volume (cm <sup>3</sup> ) | Dry weight column (g) | Average pore volume (L) in columns | Pore volume corresponding to L/S 0.1 | Pore volume corresponding to L/S 2 | Pore volume corresponding to L/S 6 | Pore volume corresponding to L/S 10 |
|---------------------|---------|----------------------------------|-----------------------|------------------------------------|--------------------------------------|------------------------------------|------------------------------------|-------------------------------------|
| Shooting range soil | High    | 580.9                            | 889.8                 | 0.2                                | 0.3                                  | 6.9                                | 13.7                               | 29.1                                |
| Shooting range soil | Low     | 567.2                            | 804.7                 | 0.3                                | 0.3                                  | 5.9                                | 10.6                               | -                                   |
| Urban soil          | Low     | 585.5                            | 567.2                 | 0.4                                | 0.2                                  | 2.7                                | 6.0                                | -                                   |

**Table S5** Limits of Quantification (LOQ) for ICP-MS analysis of aqueous samples.

|     | Fe (mg/L)             | Cu (µg/L)                                | Zn (µg/L)                                | Sb (µg/L)                                 | Pb (µg/L)                                | Ca (mg/L) | K (mg/L) | Mg (mg/L) | Na (mg/L) |
|-----|-----------------------|------------------------------------------|------------------------------------------|-------------------------------------------|------------------------------------------|-----------|----------|-----------|-----------|
| LOQ | 0.060 <sup>a, b</sup> | 0.040 <sup>a</sup><br>0.527 <sup>b</sup> | 0.035 <sup>a</sup><br>0.095 <sup>b</sup> | 0.140 <sup>a</sup><br>0.0019 <sup>b</sup> | 0.385 <sup>a</sup><br>0.010 <sup>b</sup> | 0.10      | 0.19     | 0.006     | 0.067     |

<sup>a</sup>High density shooting range soil and batch test, <sup>b</sup>Low density shooting range soil and urban soil

**Table S6** pH, EC, DOC, anion, and cation concentrations from the combined columns as a function of L/S ratio. Standard deviations are based on three replicates.

| Soil           | Density | L/S ratio | pH        | EC (µS/cm) | DOC (mg/L) | Cl <sup>-</sup> (mg/L) | NO <sub>3</sub> <sup>-</sup> (mg/L) | SO <sub>4</sub> <sup>2-</sup> (mg/L) | Na (mg/L) | Mg (mg/L) | K (mg/L)  | Ca (mg/L) | Fe (ug/L) | Cu (ug/L) | Zn (ug/L) | Pb (ug/L) | Sb (ug/L) |
|----------------|---------|-----------|-----------|------------|------------|------------------------|-------------------------------------|--------------------------------------|-----------|-----------|-----------|-----------|-----------|-----------|-----------|-----------|-----------|
| Shooting range | Low     | 0.1       | 6.6 ± 0.1 | 156 ± 20   | 37 ± 5     | 30 ± 3                 | 4.8 ± 1.1                           | 5.2 ± 0.4                            | 11 ± 1    | 2.7 ± 0.3 | 5.3 ± 0.3 | 10 ± 1    | 42 ± 28   | 326 ± 34  | 989 ± 101 | 2616 ± 34 | 338 ± 8   |

|                   |      |    |                 |                 |                 |                 |          |                 |                 |                 |                 |                 |                 |                |                   |                 |                 |
|-------------------|------|----|-----------------|-----------------|-----------------|-----------------|----------|-----------------|-----------------|-----------------|-----------------|-----------------|-----------------|----------------|-------------------|-----------------|-----------------|
| rang<br>e<br>soil |      | 2  | 6.7<br>±0.<br>2 | 31±<br>2        | 8.6<br>±0.<br>2 | 0.5<br>±0.<br>0 | 0.0      | 6.9<br>±0.<br>4 | 1.2<br>±0.<br>1 | 0.5<br>±0.<br>0 | 1.6<br>±0.<br>0 | 1.8<br>±0.<br>1 | 69±<br>24       | 138<br>±8      | 189±<br>8         | 825<br>±43      | 545<br>±1<br>8  |
|                   |      | 6  | 6.2<br>±0.<br>0 | 13<br>±1        | 2.4<br>±0.<br>2 | 0.0             | 0.0      | 1.9<br>±0.<br>3 | 0.1<br>±0.<br>1 | 0.2<br>±0.<br>0 | 1.0<br>±0.<br>1 | 0.6<br>±0.<br>3 | 53±<br>21       | 86<br>±5       | 81±1<br>0         | 592<br>±23      | 687<br>±3<br>1  |
|                   | Hig  | 0. | 5.9             | 178             | 36              | 33              | 7.1      | 4.6             | 13              | 3.2             | 5.3             | 21              | 20±             | 443            | 4435              | 3100            | 327             |
|                   | h    | 1  | ±0.<br>1        | ±7              | ±3              | ±3              | ±0.<br>9 | ±0.<br>6        | ±1              | ±0.<br>3        | ±0.<br>3        | ±1<br>3         | 32              | ±5<br>2        | ±413<br>3         | ±29<br>7        | ±2<br>7         |
|                   |      | 2  | 6.6<br>±0.<br>2 | 33±<br>2        | 8.6<br>±0.<br>4 | 0.5<br>±0.<br>1 | 0.0      | 7.0<br>±0.<br>3 | 1.6<br>±0.<br>4 | 0.8<br>±0.<br>4 | 1.7<br>±0.<br>6 | 16<br>±1<br>9   | 35±<br>42       | 171<br>±2<br>1 | 1911<br>±230<br>4 | 813<br>±11<br>1 | 597<br>±2<br>7  |
|                   |      | 6  | 6.7<br>±0.<br>0 | 16±<br>0        | 6.1<br>±1.<br>8 | 0.0             | 0.0      | 1.9<br>±0.<br>1 | 0.2<br>±0.<br>1 | 0.2<br>±0.<br>0 | 0.9<br>±0.<br>1 | 1.3<br>±0.<br>1 | 18±<br>14       | 106<br>±5      | 150±<br>26        | 578<br>±41      | 785<br>±1<br>4  |
|                   |      | 10 | 6.7<br>±0.<br>2 | 12±<br>0        | 4.5<br>±0.<br>0 | 0.0             | 0.0      | 1.3<br>±0.<br>1 | 0.2<br>±0.<br>1 | 0.2<br>±0.<br>0 | 0.8<br>±0.<br>4 | 0.9<br>±0.<br>1 | 6±4             | 81<br>±6       | 66±1<br>7         | 555<br>±33      | 907<br>±4<br>5  |
|                   | Urb  | 0. | 8.4             | 780             | 31              | 10              | 3.1      | 10              | 18              | 10              | 43              | 137             | 42±             | 39             | 17±5              | 28±             | 6.1             |
|                   | an   | 1  | ±0.<br>0        | ±19             | ±2              | ±2              | ±2.<br>1 | ±1              | ±1              | ±0              | ±2              | ±5              | 13              | ±5             |                   | 8               | ±0.<br>6        |
|                   | soil | 2  | 8.5<br>±0.<br>0 | 397<br>±44<br>0 | 19<br>±2<br>3   | 1.7<br>±0.<br>3 | 0.0      | 2.6<br>±0.<br>4 | 7±<br>1         | 5±<br>1         | 27<br>±4        | 63<br>±5        | 66±<br>16       | 32<br>±3       | 0.0±<br>0.1       | 6.4±<br>2.2     | 2.6<br>±0.<br>7 |
|                   |      | 6  | 8.4<br>±0.<br>2 | 296<br>±36      | 13<br>±2        | 0.2<br>±0.<br>0 | 0.0      | 0.2<br>±0.<br>1 | 1±<br>1         | 3±<br>0         | 15<br>±2        | 46<br>±6        | 239<br>±13<br>3 | 37<br>±6       | 0.8±<br>1.2       | 4.5±<br>2.4     | 0.9<br>±0.<br>1 |

**Table S7** pH, EC, DOC, anion, and cation concentrations in the one-stage batch test (L/S 10). Standard deviations are based on three replicates.

| Soil                      | pH              | EC<br>(μS/<br>cm) | DO<br>C<br>(mg<br>/L) | Cl <sup>-</sup><br>(mg<br>/L) | NO <sub>3</sub> <sup>-</sup> -N<br>(mg<br>/L) | SO <sub>4</sub> <sup>2-</sup><br>(mg<br>/L) | Na<br>(mg<br>/L) | Mg<br>(mg<br>/L) | K<br>(mg<br>/L) | Ca<br>(mg<br>/L) | Fe<br>(mg<br>/L) | Cu<br>(ug<br>/L) | Zn<br>(ug/<br>L) | Pb<br>(ug/<br>L) | Sb<br>(ug/<br>L) |
|---------------------------|-----------------|-------------------|-----------------------|-------------------------------|-----------------------------------------------|---------------------------------------------|------------------|------------------|-----------------|------------------|------------------|------------------|------------------|------------------|------------------|
| Shooting<br>range<br>soil | 6.2<br>±0.<br>1 | 14±<br>2          | 8.1<br>±0.<br>8       | 0.5<br>±0.<br>0               | 2.0<br>±0.<br>1                               | 0.8<br>±0.<br>1                             | 0.5<br>±0.<br>1  | 0.2<br>±0.<br>0  | 0.7<br>±0.<br>0 | 1.1<br>±0.<br>2  | 0.1<br>±0.<br>1  | 89<br>±6         | 408<br>±96       | 346<br>±35       | 480<br>±20       |
| Urban<br>soil             | 7.9<br>±0.<br>1 | 178<br>±7         | 9.6<br>±2.<br>3       | 0.4<br>±0.<br>1               | 0.1<br>±0.<br>0                               | 1.4<br>±0.<br>1                             | 2.1<br>±0.<br>2  | 3.4<br>±2.<br>2  | 12±<br>1        | 28±<br>1         | 6±7              | 48<br>±2<br>4    | 233<br>±10<br>5  | 232<br>±28<br>3  | 5±2              |

**Table S8** Hydraulic conductivity derived from the combined columns ( $K_{exp}$ ) as a function of L/S ratio.

| Shooting range soil (high density) |                    |             |                    |             |                    | Shooting range soil (low density) |                    |             |                    |             |                    | Urban soil (low density) |                    |             |                    |             |                    |
|------------------------------------|--------------------|-------------|--------------------|-------------|--------------------|-----------------------------------|--------------------|-------------|--------------------|-------------|--------------------|--------------------------|--------------------|-------------|--------------------|-------------|--------------------|
| Replicate 1                        |                    | Replicate 2 |                    | Replicate 3 |                    | Replicate 1                       |                    | Replicate 2 |                    | Replicate 3 |                    | Replicate 1              |                    | Replicate 2 |                    | Replicate 3 |                    |
| L/<br>S                            | $K_{exp}$<br>(m/s) | L/<br>S     | $K_{exp}$<br>(m/s) | L/<br>S     | $K_{exp}$<br>(m/s) | L/<br>S                           | $K_{exp}$<br>(m/s) | L/<br>S     | $K_{exp}$<br>(m/s) | L/<br>S     | $K_{exp}$<br>(m/s) | L/<br>S                  | $K_{exp}$<br>(m/s) | L/<br>S     | $K_{exp}$<br>(m/s) | L/<br>S     | $K_{exp}$<br>(m/s) |

|      |         |     |         |     |         |     |         |     |         |     |         |     |         |     |         |     |         |
|------|---------|-----|---------|-----|---------|-----|---------|-----|---------|-----|---------|-----|---------|-----|---------|-----|---------|
| 0.1  | 5.8E-07 | 0.0 | 5.6E-07 | 0.0 | 4.7E-07 | 0.0 | 1.5E-06 | 0.1 | 1.6E-06 | 0.1 | 1.2E-06 | 0.1 | 1.5E-04 | 0.1 | 2.4E-04 | 0.1 | 2.0E-04 |
| 0.3  | 5.8E-07 | 0.3 | 5.2E-07 | 0.2 | 4.0E-07 | 0.6 | 1.0E-06 | 0.7 | 9.8E-07 | 0.7 | 4.6E-07 | 2.0 | 6.2E-05 | 2.0 | 1.2E-04 | 2.0 | 9.0E-05 |
| 0.5  | 5.4E-07 | 0.5 | 4.8E-07 | 0.4 | 3.4E-07 | 1.0 | 8.7E-07 | 1.0 | 8.3E-07 | 1.1 | 4.8E-07 | 5.0 | 9.8E-05 | 5.0 | 2.1E-04 | 5.0 | 1.5E-04 |
| 0.8  | 5.0E-07 | 0.8 | 4.4E-07 | 0.5 | 4.2E-07 | 1.9 | 9.3E-07 | 2.1 | 5.7E-07 | 1.7 | 1.7E-06 |     |         |     |         |     |         |
| 1.9  | 3.5E-07 | 1.9 | 3.7E-07 | 1.5 | 4.1E-07 | 2.3 | 7.4E-07 | 2.5 | 6.4E-07 | 4.2 | 3.0E-07 |     |         |     |         |     |         |
| 2.1  | 3.2E-07 | 2.3 | 3.3E-07 | 1.8 | 2.7E-07 | 3.4 | 5.5E-07 | 3.5 | 4.3E-07 | 4.8 | 8.9E-07 |     |         |     |         |     |         |
| 2.3  | 3.0E-07 | 3.7 | 2.4E-07 | 2.8 | 2.2E-07 | 4.8 | 5.2E-07 | 4.8 | 3.7E-07 | 4.6 | 4.2E-06 |     |         |     |         |     |         |
| 3.5  | 3.1E-07 | 3.8 | 2.8E-07 | 3.2 | 2.2E-07 | 5.7 | 5.7E-07 | 5.5 | 3.1E-07 |     |         |     |         |     |         |     |         |
| 4.8  | 3.0E-07 | 5.4 | 2.5E-07 | 4.7 | 1.9E-07 |     |         | 6.0 | 2.7E-07 |     |         |     |         |     |         |     |         |
| 5.4  | 2.0E-07 | 5.8 | 2.4E-07 | 5.2 | 1.8E-07 |     |         |     |         |     |         |     |         |     |         |     |         |
| 5.8  | 1.9E-07 | 6.7 | 2.4E-07 | 6.2 | 1.6E-07 |     |         |     |         |     |         |     |         |     |         |     |         |
| 6.8  | 1.8E-07 | 7.7 | 3.6E-07 | 7.3 | 1.5E-07 |     |         |     |         |     |         |     |         |     |         |     |         |
| 7.8  | 1.6E-07 | 8.8 | 4.5E-07 | 8.0 | 1.5E-07 |     |         |     |         |     |         |     |         |     |         |     |         |
| 8.3  | 2.1E-07 | 8.9 | 5.1E-07 | 8.8 | 1.4E-07 |     |         |     |         |     |         |     |         |     |         |     |         |
| 8.6  | 2.1E-07 | 9.4 | 9.4E-07 | 9.6 | 1.4E-07 |     |         |     |         |     |         |     |         |     |         |     |         |
| 9.1  | 2.1E-07 | 9.7 | 1.1E-06 | 9.8 | 1.3E-07 |     |         |     |         |     |         |     |         |     |         |     |         |
| 10.0 | 2.3E-07 |     |         | 9.9 | 1.3E-07 |     |         |     |         |     |         |     |         |     |         |     |         |

**Table S9** Cumulative releases of DOC, Cu, Zn, Pb, and Sb from the combined columns as a function of L/S ratio. Standard deviations are based on three replicates.

| Soil                | Density | L/S ratio | DOC (mg/kg) | Cu (mg/kg) | Zn (mg/kg) | Pb (mg/kg) | Sb (mg/kg) |
|---------------------|---------|-----------|-------------|------------|------------|------------|------------|
| Shooting range soil | Low     | 0.1       | 2.3±0.7     | 0.0        | 0.1±0.0    | 0.2±0.0    | 0.0        |
|                     |         | 2         | 20±2        | 0.3±0.0    | 0.5±0.0    | 1.9±0.1    | 1.1±0.0    |
|                     |         | 6         | 29±1        | 0.6±0.0    | 0.7±0.0    | 3.9±0.1    | 3.5±0.5    |
|                     | High    | 0.1       | 2.8±0.2     | 0.0        | 0.4±0.4    | 0.2±0.0    | 0.0±0.0    |
|                     |         | 2         | 19±1        | 0.4±0.0    | 3.8±4.0    | 1.8±0.2    | 1.2±0.1    |

|            |     |     |         |           |           |           |           |
|------------|-----|-----|---------|-----------|-----------|-----------|-----------|
|            |     | 10  | 55±1    | 1.0±0.1   | 4.4±0.4   | 6.2±0.4   | 8.4±0.3   |
| Urban soil | Low | 0.1 | 3.6±0.5 | 0.01±0.00 | 0.00      | 0.00      | 0.00      |
|            |     | 2   | 37±2    | 0.07±0.01 | 0.00      | 0.02±0.01 | 0.01±0.00 |
|            |     | 6   | 87±15   | 0.27±0.06 | 0.01±0.01 | 0.03±0.02 | 0.01±0.00 |

**Table S10** Comparison leaching and transport for the combined column test (CCT) versus leaching and transport from the batch test (BT) combined with Hazen's equation.

| Leaching | Transport        | Pb (mg/y) | Sb (mg/y) | Cu (mg/y) |
|----------|------------------|-----------|-----------|-----------|
| CCT      | CCT              | 490       | 801       | 72        |
| BT       | Hazen's Equation | 263       | 364       | 68        |

**Figure S1**

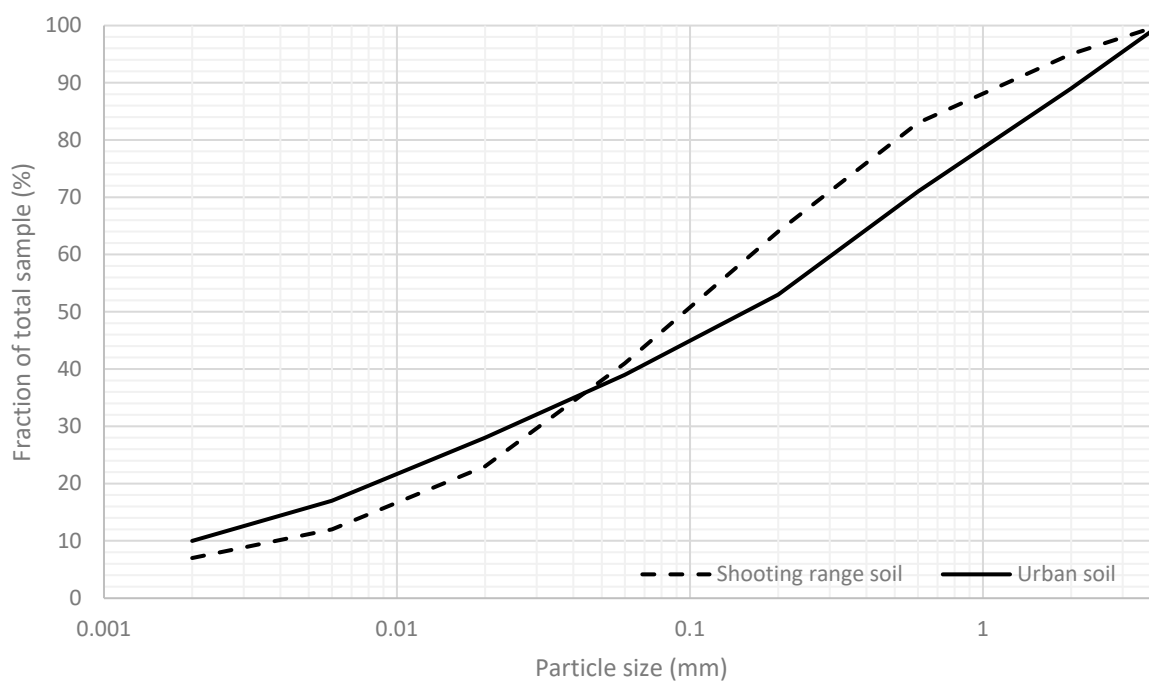

Figure S1: Particle size distribution curves.
